# Supplementary material for: Optical and magnetic characterization of one-dimensional Cu(ii)-based perovskite: a high UV–Vis–NIR absorber
Source: Royal Society of Chemistry journal article supplement (doi:10.1039/d1tc04336f), 2021-01-01
Supplement: d1tc04336f1.pdf [file d1tc04336f1.pdf]

## Supplementary Data

### Optical and magnetic characterizations of one-dimensional Cu(II)-based perovskite: A high UV-Vis-NIR absorber

Wiem Jabeur,<sup>a</sup> Rawia Msalmi,<sup>a</sup> Marcus Korb,<sup>b</sup> Mariia Holub,<sup>c</sup> Edoardo Mosconi,<sup>d</sup> Erik Čížmár,<sup>c</sup> Anowar Tozri,<sup>e</sup>  
Numa A. Althubiti<sup>e\*</sup> and Houcine Naïli<sup>a\*</sup>

**Table S1.** Crystal data and refinement parameters of (C<sub>5</sub>H<sub>8</sub>N<sub>3</sub>)[CuCl<sub>3</sub>].

|                                                  |                                                                |
|--------------------------------------------------|----------------------------------------------------------------|
| Empirical formula                                | C <sub>5</sub> H <sub>8</sub> N <sub>3</sub> CuCl <sub>3</sub> |
| Formula weight (g.mol <sup>-1</sup> )            | 560.07                                                         |
| Wavelength                                       | 0.71073                                                        |
| Temperature (K)                                  | 124.8(4)                                                       |
| Crystal system                                   | Triclinic                                                      |
| Space group                                      | P-1                                                            |
| a (Å)                                            | 3.9057(6)                                                      |
| b (Å)                                            | 10.3349(13)                                                    |
| c (Å)                                            | 11.3405(15)                                                    |
| α (°)                                            | 94.842(11)                                                     |
| β (°)                                            | 93.385(11)                                                     |
| γ (°)                                            | 90.039(11)                                                     |
| V (Å <sup>3</sup> )                              | 455.32(11)                                                     |
| Z                                                | 2                                                              |
| Calculated density (mg/m <sup>3</sup> )          | 2.043                                                          |
| Absorption coefficient (mm <sup>-1</sup> )       | 3.222                                                          |
| F(000)                                           | 278                                                            |
| Crystal size (mm <sup>3</sup> )                  | 0.3 x 0.3 x 0.3                                                |
| θ range for data collection (°)                  | 3.612 to 24.997                                                |
| h,k,l range                                      | -4 ≤ h ≤ 4; -12 ≤ k ≤ 9; -13 ≤ l ≤ 13                          |
| Reflections collected/independent                | 3079/3079 (Rint =0.0551)                                       |
| Absorption correction                            | Semi-empirical from equivalents                                |
| Transmission factors                             | Tmin=0.74469, Tmax=1.00000                                     |
| Number of parameters                             | 110                                                            |
| Goodness of fit (F2)                             | 1.034                                                          |
| R1                                               | 0.1049                                                         |
| wR2 (I>2σ(I))                                    | 0.2434                                                         |
| Extinction coefficient                           | n/a                                                            |
| Largest diff. peak and hole (e.Å <sup>-3</sup> ) | 1.687 and -0.957                                               |

**Table S2.** Geometric data ( $\text{\AA}/^\circ$ ) of the inorganic fragment

| Cu-Cl distances ( $\text{\AA}$ ) |          | Cl-Cu-Cl angles ( $^\circ$ ) |           |
|----------------------------------|----------|------------------------------|-----------|
| Cu1-Cl1                          | 2.269(2) | Cl1-Cu1-Cl2                  | 96.80(8)  |
| Cu1-Cl2                          | 2.239(2) | Cl1-Cu1-Cl3                  | 91.10(8)  |
| Cu1-Cl3                          | 2.294(2) | Cl1-Cu1-Cl3 <sup>A</sup>     | 173.55(9) |
| Cu1-Cl3 <sup>A</sup>             | 2.310(2) | Cl2-Cu1-Cl3                  | 170.72(8) |
| Cu-Cl1 <sup>iii</sup>            | 3.013(2) | Cl2-Cu1-Cl3 <sup>A</sup>     | 89.40(8)  |
| Cu-Cl3 <sup>iv</sup>             | 3.082(2) | Cl3-Cu1-Cl3 <sup>A</sup>     | 82.57(8)  |
|                                  |          | Cu1-Cl3-Cu1 <sup>A</sup>     | 97.43(8)  |

Symmetry code : (A) -x+1, -y, -z; iii: 1+x, y, z; iv: -x, -y, -z.

**Table S3.** Hydrogen-bond properties

| D-H $\cdots$ A                    | d(D $\cdots$ A)( $\text{\AA}$ ) | d(H $\cdots$ A) ( $\text{\AA}$ ) | $\angle$ D-H $\cdots$ A( $^\circ$ ) |
|-----------------------------------|---------------------------------|----------------------------------|-------------------------------------|
| N3-H3NA $\cdots$ N2 <sup>B</sup>  | 3.014(10)                       | 2.16                             | 176                                 |
| N3-H3NB $\cdots$ Cl1 <sup>i</sup> | 3.257(8)                        | 2.41                             | 169                                 |
| N1-H1N $\cdots$ Cl2 <sup>i</sup>  | 3.085(7)                        | 2.29                             | 153                                 |

Symmetry codes: B: -1-x, -1-y, 1-z; i: x, -1+y, z;

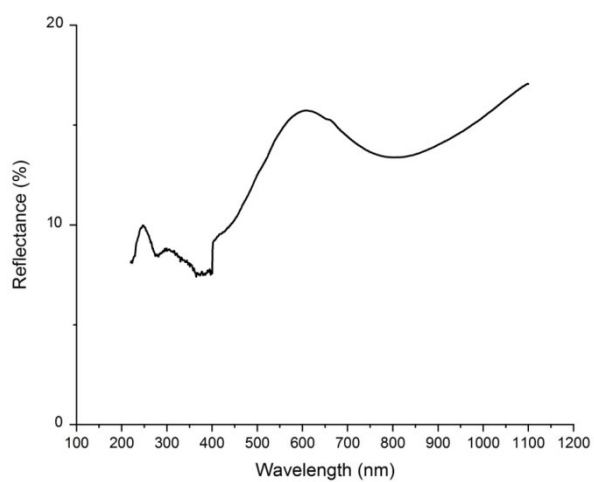

**Figure S1 :** Diffuse reflectance spectrum of  $(C_5H_8N_3)[CuCl_3]$ .

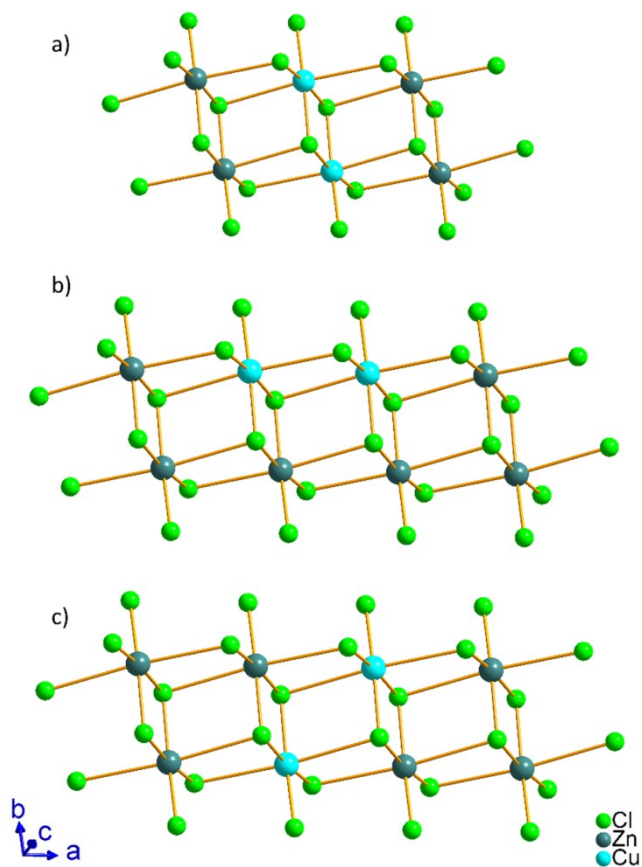

**Figure S2:** Model fragments used for BS DFT calculation of the rung (a), leg (b), and frustrating (c) exchange interaction in  $(C_5H_8N_3)[CuCl_3]$ .
